# Supplementary material for: Post-trial follow-up methodology in large randomised controlled trials: a systematic review
Source: PubMed Central journal article supplement (PMC5975470; doi:10.1186/s13063-018-2653-0), 2018-05-30
Supplement: 13063_2018_2653_MOESM2_ESM.pdf [file 13063_2018_2653_MOESM2_ESM.pdf]

## Appendix A: Search Strategies

### Medline Search strategy

- Search conducted via OvidSP interface: 1946-present in process & other non-indexed citations

| Step | Search domain                     | Search terms                                                                                                                                                                                                                                                                                                                                                                                                                                                                                                                                                              |
|------|-----------------------------------|---------------------------------------------------------------------------------------------------------------------------------------------------------------------------------------------------------------------------------------------------------------------------------------------------------------------------------------------------------------------------------------------------------------------------------------------------------------------------------------------------------------------------------------------------------------------------|
| s1   | Randomized controlled trials      | randomized controlled trial.pt. or random?ed control* trial*.mp. or random allocation/                                                                                                                                                                                                                                                                                                                                                                                                                                                                                    |
| 2    | Post- trial                       | (Post-trial or post trial or attrition or drop out? or dropout? or follow-up or followup? or extension* or trial closure? or long-term or longterm or extended observation* or extended stud*).mp.                                                                                                                                                                                                                                                                                                                                                                        |
| 3    | Outcomes                          | (cost effective* or cost benefit* or costs or survivors or hospital admission? or hospitali?ation? or primary outcome* or secondary outcome* or primary endpoint? or secondary endpoint? or composite endpoint? or primary end point? or secondary end point? or composite end point? or outcome measure* or outcome assessment or outcomes research).mp. or treatment outcome/                                                                                                                                                                                           |
| 4    | Types of methodological follow-up | electronic data processings/ or automatic data processing/ or "surveys and questionnaires"/ or telephone/ or interview/ or data collection methods/ or data collection/ or data linkage/ or data system?.mp. or data reporting/ or epidemiologic method?.mp. or incidence.mp. or mortality.mp. or health episode statistics.mp. or electronic health record?.mp. or electronic patient record?.mp. or computeri?ed record-linkage system?.mp. or national register*.mp. or national database*.mp. or episode of care/ or routine data.mp. or routinely collected data.mp. |
| 5    |                                   | 1 and 2 and 3 or 4                                                                                                                                                                                                                                                                                                                                                                                                                                                                                                                                                        |
| 6    | 5                                 | exp animals/ not humans.sh.                                                                                                                                                                                                                                                                                                                                                                                                                                                                                                                                               |
| 7    | 6                                 | limit to (abstracts and English language and yr="2006 - Current")                                                                                                                                                                                                                                                                                                                                                                                                                                                                                                         |

*Key to operators used in Medline/Ovid: where .pt is publication type, (?) represents any single character, (\*) is a group of characters, .mp.is multi-purpose search, /is Medical Subject Headings (MeSH), exp is explode subject heading, .sh. is subject heading, (" ") is phrase search.*

## Embase Search Strategy

- Search conducted via OvidSP interface 1<sup>st</sup> March 1974-12 April 2017

| Step | Search terms                                                                                                                                                                                                                                                                                                                                                                                                                                                                                             |
|------|----------------------------------------------------------------------------------------------------------------------------------------------------------------------------------------------------------------------------------------------------------------------------------------------------------------------------------------------------------------------------------------------------------------------------------------------------------------------------------------------------------|
| 1    | exp medical record/ or interview/ or telephone interview/ or survey?.mp. or questionnaire?.mp. or data system?.mp. or epidemiologic method?.mp. or incidence.tw. or mortality.tw. or cardiovascular mortality/ or cancer mortality/ or *mortality/ or health episode statistics.mp. or electronic health record?.mp. or electronic patient record?.mp. or computeri?ed record-linkage system?.mp. or national registr*.mp. or national database*.mp. or routine data.mp. or routinely collected data.mp. |
| 2    | (cost effective* or cost benefit* or costs).mp. or clinical effectiveness/ or effectiveness.mp. or survivors.mp. or hospital admission?.mp. or hospital episode?.mp. or hospitali?ation?.mp. or primary outcome*.mp. or secondary outcome*.mp. or outcome measure*.mp. or outcome assessment.mp. or outcomes research.mp. or treatment outcome/ or treatment duration/                                                                                                                                   |
| 3    | randomized controlled trial/ or ((random* or blind* or placebo*).tw. and major clinical study/)                                                                                                                                                                                                                                                                                                                                                                                                          |
| 4    | (Post-trial or posttrial or attrition or drop out? or dropout? or follow-up or followup? or extension* or trial closure? or long-term or longterm or extended observation*).mp.                                                                                                                                                                                                                                                                                                                          |
| 5    | 1 and 2 and 3 and 4                                                                                                                                                                                                                                                                                                                                                                                                                                                                                      |
| 6    | (exp animals/ or nonhuman/) not human/                                                                                                                                                                                                                                                                                                                                                                                                                                                                   |
| 7    | 5 not 6                                                                                                                                                                                                                                                                                                                                                                                                                                                                                                  |
| 8    | limit 7 to (english language and yr="2000 -Current")                                                                                                                                                                                                                                                                                                                                                                                                                                                     |
| 9    | (letter or editorial or conference*).pt.                                                                                                                                                                                                                                                                                                                                                                                                                                                                 |
| 10   | 8 not 9                                                                                                                                                                                                                                                                                                                                                                                                                                                                                                  |

## **Cochrane Library Search Strategy**

- Search conducted via Cochrane Library via Wiley interface
- Cochrane Central Register for Controlled Trials (*Issue 3 of 12, March 2017*)
- Cochrane Methods Register (*Issue 3 of 4, July 2017*)

| Step | Search terms                                                                                                                                                                                                                                                                                                                                                                                                                                  |
|------|-----------------------------------------------------------------------------------------------------------------------------------------------------------------------------------------------------------------------------------------------------------------------------------------------------------------------------------------------------------------------------------------------------------------------------------------------|
| 1    | MeSH descriptor: [Surveys and Questionnaires] this term only                                                                                                                                                                                                                                                                                                                                                                                  |
| 2    | MeSH descriptor: [Data Collection] this term only                                                                                                                                                                                                                                                                                                                                                                                             |
| 3    | MeSH descriptor: [Interview] explode all trees                                                                                                                                                                                                                                                                                                                                                                                                |
| 4    | MeSH descriptor: [Automatic Data Processing] this term only                                                                                                                                                                                                                                                                                                                                                                                   |
| 5    | data collection or "data processing*" or "data system*" or "data linkage" or "data reporting" or incidence or mortality or "health episode statistics" or "electronic health record*" or "electronic patient record*" or "record linkage system" or "record-linkage system*" or "national registr*" or "national database" or "episode of care" or "routine data" or "routinely collected data":ti,ab,kw (Word variations have been searched) |
| 6    | 1 or 2 or 3 or 4 or 5                                                                                                                                                                                                                                                                                                                                                                                                                         |
| 7    | cost effective* or "cost benefit*" or costs or "clinical effectiveness" or survivors or "hospital admission*" or hospitalisation* or hospitalization* or "primary outcome*" or "secondary outcome*" or "outcome measure*" or "outcome assessment" or "outcomes research" or "treatment outcome":ti,ab,kw (Word variations have been searched)                                                                                                 |
| #8   | post trial or posttrial or attrition or "drop out*" or dropout* or "follow up" or followup* or extension or "trial closure*" or "long term" or longterm or "extended observation*":ti,ab,kw (Word variations have been searched)                                                                                                                                                                                                              |
| #9   | #6 and #7 and #8                                                                                                                                                                                                                                                                                                                                                                                                                              |

## **Clinical Trials Search Strategy**

- <http://clinicaltrials.gov>

|   | Search terms                                                                                           | Limits                                         |
|---|--------------------------------------------------------------------------------------------------------|------------------------------------------------|
| 1 | post-trial OR "post trial" OR posttrial OR attrition OR "drop out" OR dropout OR extension OR extended | Studies With Results<br>Interventional Studies |
| 2 | longterm OR long-term OR "long term" OR follow-up OR "follow up" OR followup                           | Studies With Results<br>Interventional Studies |
|   | <b>1 or 2</b>                                                                                          |                                                |

### **Comments:**

All results were downloaded with all fields displayed and in a tab delimited format. This file was then opened in ExCel. Duplicates were removed. The spreadsheet sort order was changed to Enrollment A-Z and studies with fewer than 1000 enrolees will be removed.
