# Supplementary material for: Post-trial follow-up methodology in large randomised controlled trials: a systematic review
Source: PubMed Central journal article supplement (PMC5975470; doi:10.1186/s13063-018-2653-0), 2018-05-30
Supplement: 13063_2018_2653_MOESM3_ESM.pdf [file 13063_2018_2653_MOESM3_ESM.pdf]

## Appendix B: Trials with long-term follow-up excluded from final analysis

| Exclusion Criteria                                                                                                                               | Name of 1st Author                        | Year of PTFU publication | Name of Trial/Title of paper (ABBREVIATION where possible)                                          |
|--------------------------------------------------------------------------------------------------------------------------------------------------|-------------------------------------------|--------------------------|-----------------------------------------------------------------------------------------------------|
| <b>Indeterminate primary outcomes</b>                                                                                                            |                                           |                          |                                                                                                     |
|                                                                                                                                                  | Bosset J                                  | 2014                     | EORTC 22921                                                                                         |
|                                                                                                                                                  | Collaborative Ocular Melanoma Study Group | 2006                     | COMS                                                                                                |
|                                                                                                                                                  | Cuzick J                                  | 2014                     | IBIS-II                                                                                             |
|                                                                                                                                                  | Donker M                                  | 2013                     | EORTC 10853                                                                                         |
|                                                                                                                                                  | Ligibel J                                 | 2015                     | CALGB 9741                                                                                          |
|                                                                                                                                                  | Lundstedt D                               | 2010                     | SWEBBCG91-RT                                                                                        |
|                                                                                                                                                  | Poortmans PM                              | 2015                     | EORTC 22922/10925                                                                                   |
|                                                                                                                                                  | Regan MM                                  | 2011                     | BIG 1-98                                                                                            |
|                                                                                                                                                  | Sparano J                                 | 2015                     | E1199                                                                                               |
|                                                                                                                                                  | Van Gijn W                                | 2011                     | TME Trial                                                                                           |
| <b>Post-hoc analysis of included paper</b>                                                                                                       |                                           |                          |                                                                                                     |
|                                                                                                                                                  | Abedini S                                 | 2009                     | ALERT                                                                                               |
|                                                                                                                                                  | Abedini S                                 | 2009                     | ALERT                                                                                               |
|                                                                                                                                                  | Abedini S                                 | 2010                     | ALERT                                                                                               |
|                                                                                                                                                  | Adlbrecht C                               | 2014                     | OAT                                                                                                 |
|                                                                                                                                                  | Alderman M                                | 2016                     | ALLHAT                                                                                              |
|                                                                                                                                                  | Alva ML                                   | 2015                     | UKPDS                                                                                               |
|                                                                                                                                                  | Chowdhury E                               | 2015                     | ANBP2                                                                                               |
|                                                                                                                                                  | Lotan Y                                   | 2012                     | SELECT                                                                                              |
|                                                                                                                                                  | Wilson R                                  | 2009                     | Assessment of survival in a 2-year comparative study of lanthanum carbonate versus standard therapy |
| <b>Screening randomised controlled trials</b>                                                                                                    |                                           |                          |                                                                                                     |
|                                                                                                                                                  | Oken M                                    | 2011                     | PLCO                                                                                                |
|                                                                                                                                                  | Schroder F                                | 2014                     | ERSPC                                                                                               |
|                                                                                                                                                  | Swanson S                                 | 2015                     | Norwegian Colorectal Cancer Prevention Trial                                                        |
|                                                                                                                                                  | van Leeuwen PJ                            | 2012                     | ERSPC                                                                                               |
| <b>Subgroup analysis of included paper</b>                                                                                                       |                                           |                          |                                                                                                     |
|                                                                                                                                                  | Barzilay J                                | 2012                     | ALLHAT                                                                                              |
|                                                                                                                                                  | Brown L                                   | 2008                     | OAT                                                                                                 |
|                                                                                                                                                  | Kappetein AP                              | 2013                     | SYNTAX                                                                                              |
|                                                                                                                                                  | Kataja-Tuomola MK                         | 2010                     | ATBC                                                                                                |
|                                                                                                                                                  | Mack MJ                                   | 2013                     | SYNTAX                                                                                              |
|                                                                                                                                                  | Margolis K                                | 2013                     | ALLHAT                                                                                              |
|                                                                                                                                                  | Menon V                                   | 2013                     | OAT                                                                                                 |
|                                                                                                                                                  | Oparil S                                  | 2013                     | ALLHAT                                                                                              |
|                                                                                                                                                  | Piller L                                  | 2011                     | ALLHAT                                                                                              |
|                                                                                                                                                  | Poortvliet RK                             | 2012                     | PROSPER                                                                                             |
|                                                                                                                                                  | Rahman M                                  | 2012                     | ALLHAT                                                                                              |
|                                                                                                                                                  | Robinson JG                               | 2012                     | PHS                                                                                                 |
|                                                                                                                                                  | Skolnick AH                               | 2012                     | OAT                                                                                                 |
|                                                                                                                                                  | Yamal J                                   | 2014                     | ALLHAT                                                                                              |
| <b>Trial terminated early</b>                                                                                                                    |                                           |                          |                                                                                                     |
|                                                                                                                                                  | Anderson GL                               | 2012                     | WHI (Estrogen)                                                                                      |
|                                                                                                                                                  | Barsheshet A                              | 2011                     | MADIT-II                                                                                            |
|                                                                                                                                                  | Goldenberg I                              | 2010                     | MADIT-II                                                                                            |
|                                                                                                                                                  | Goodman PJ                                | 2013                     | SELECT                                                                                              |
|                                                                                                                                                  | Molyneux A                                | 2009                     | ISAT                                                                                                |
|                                                                                                                                                  | Molyneux A                                | 2015                     | ISAT                                                                                                |
|                                                                                                                                                  | Nielsen PH                                | 2010                     | DANAMI-2                                                                                            |
|                                                                                                                                                  | Rutqvist LE                               | 2007                     | The Stockholm Breast Cancer Study                                                                   |
|                                                                                                                                                  | Schierbeck L                              | 2012                     | The Danish Osteoporosis Prevention Study                                                            |
|                                                                                                                                                  | Sever PS                                  | 2011                     | ASCOT-LLA                                                                                           |
| <b>Active intervention in post-trial follow-up</b>                                                                                               |                                           |                          |                                                                                                     |
|                                                                                                                                                  | Aroda VR                                  | 2015                     | DPPOS                                                                                               |
|                                                                                                                                                  | Connolly SJ                               | 2013                     | RELY-ABLE                                                                                           |
|                                                                                                                                                  | Diabetes Prevention Program Research      | 2009                     | DPPOS                                                                                               |
|                                                                                                                                                  | Smith TR                                  | 2010                     | Combination therapy with amlodipine/valsartan in essential hypertension*                            |
| *open-label study investigating safety doses of intervention. Extension study of two previous RCT's. (Philipp T et al Clin Ther 2007; 29:563-80) |                                           |                          |                                                                                                     |
