# Supplementary material for: Post-trial follow-up methodology in large randomised controlled trials: a systematic review
Source: PubMed Central journal article supplement (PMC5975470; doi:10.1186/s13063-018-2653-0), 2018-05-30
Supplement: 13063_2018_2653_MOESM4_ESM.pdf [file 13063_2018_2653_MOESM4_ESM.pdf]

**Appendix C: Risk of bias shown in each domain for an individual RCT. Red indicates high risk, yellow indicates unsure and green indicates low risk.**

|                                        | Allocation concealment? | Sequence Generation | Blinding of outcome assessors | Blinding of participants and personnel | Selective outcome reporting | Incomplete outcome data | Other sources of bias |
|----------------------------------------|-------------------------|---------------------|-------------------------------|----------------------------------------|-----------------------------|-------------------------|-----------------------|
| Alan 2015                              | ●                       | ●                   | ●                             | ●                                      | ●                           | ●                       | ●                     |
| Arber 2011                             | ?                       | ●                   | ●                             | ●                                      | ●                           | ●                       | ●                     |
| Avenell 2012                           | ●                       | ●                   | ●                             | ●                                      | ●                           | ●                       | ●                     |
| BarInVestigators 2007                  | ●                       | ●                   | ?                             | ●                                      | ●                           | ●                       | ●                     |
| Brellner 2011                          | ●                       | ●                   | ●                             | ●                                      | ●                           | ●                       | ●                     |
| Carson 2015                            | ●                       | ●                   | ●                             | ●                                      | ●                           | ●                       | ●                     |
| Caughey 2013                           | ●                       | ●                   | ●                             | ●                                      | ●                           | ●                       | ●                     |
| Cherry 2014                            | ●                       | ●                   | ●                             | ●                                      | ●                           | ●                       | ●                     |
| Chew 2013                              | ●                       | ●                   | ●                             | ●                                      | ●                           | ●                       | ●                     |
| Chowdhury 2014                         | ●                       | ●                   | ●                             | ●                                      | ●                           | ●                       | ●                     |
| Cushman 2012                           | ●                       | ●                   | ●                             | ●                                      | ●                           | ●                       | ●                     |
| Dienstag 2011                          | ●                       | ●                   | ●                             | ?                                      | ●                           | ●                       | ●                     |
| DreamOnInvestigators 2011              | ●                       | ●                   | ●                             | ●                                      | ●                           | ●                       | ●                     |
| Eastell 2015                           | ●                       | ●                   | ●                             | ●                                      | ●                           | ●                       | ●                     |
| Einstein 2011                          | ●                       | ●                   | ●                             | ●                                      | ●                           | ●                       | ●                     |
| Erdmann 2014                           | ●                       | ●                   | ●                             | ●                                      | ●                           | ●                       | ●                     |
| Ezzedine 2010                          | ●                       | ●                   | ●                             | ●                                      | ●                           | ●                       | ●                     |
| Ford 2007                              | ●                       | ●                   | ●                             | ●                                      | ●                           | ●                       | ●                     |
| Gada 2013                              | ●                       | ●                   | ●                             | ●                                      | ●                           | ●                       | ●                     |
| Gallagher 2014                         | ●                       | ●                   | ●                             | ●                                      | ●                           | ●                       | ?                     |
| Glud 2008                              | ●                       | ●                   | ●                             | ●                                      | ●                           | ●                       | ●                     |
| Goldenberg 2009                        | ●                       | ●                   | ●                             | ●                                      | ●                           | ●                       | ●                     |
| Gordon 2012                            | ●                       | ●                   | ●                             | ●                                      | ●                           | ●                       | ●                     |
| Grau 2009                              | ●                       | ●                   | ●                             | ●                                      | ●                           | ●                       | ●                     |
| Grubb 2013                             | ●                       | ●                   | ●                             | ●                                      | ●                           | ●                       | ●                     |
| Hackshaw 2011                          | ●                       | ●                   | ●                             | ●                                      | ?                           | ●                       | ●                     |
| Halliday 2010                          | ●                       | ●                   | ●                             | ●                                      | ●                           | ●                       | ●                     |
| Hayashino 2009                         | ●                       | ●                   | ●                             | ●                                      | ●                           | ●                       | ●                     |
| Hayward 2015                           | ●                       | ?                   | ?                             | ●                                      | ●                           | ●                       | ●                     |
| HeartProtectionStudyCollaborative 2011 | ●                       | ●                   | ●                             | ●                                      | ●                           | ●                       | ●                     |
| Henderson 2015                         | ●                       | ●                   | ●                             | ?                                      | ●                           | ●                       | ●                     |
| Hirsch 2007                            | ●                       | ●                   | ●                             | ?                                      | ●                           | ●                       | ●                     |
| Hochman 2011                           | ●                       | ●                   | ●                             | ●                                      | ●                           | ●                       | ●                     |
| Holman 2008                            | ●                       | ●                   | ●                             | ●                                      | ●                           | ●                       | ●                     |
| Hong 2014                              | ●                       | ?                   | ●                             | ●                                      | ●                           | ●                       | ●                     |
| Hornslien 2015                         | ●                       | ●                   | ●                             | ●                                      | ●                           | ●                       | ●                     |
| Johnson 2015                           | ●                       | ●                   | ●                             | ●                                      | ●                           | ●                       | ●                     |
| Jones 2015                             | ●                       | ●                   | ●                             | ●                                      | ●                           | ●                       | ●                     |
| Kostis 2011                            | ●                       | ●                   | ●                             | ●                                      | ●                           | ●                       | ●                     |
| Lai 2014                               | ●                       | ●                   | ●                             | ●                                      | ●                           | ●                       | ●                     |
| Laterre 2007                           | ●                       | ●                   | ●                             | ●                                      | ●                           | ●                       | ●                     |
| Leslie 2011                            | ●                       | ●                   | ●                             | ●                                      | ●                           | ●                       | ●                     |
| Leslie 2015                            | ●                       | ●                   | ●                             | ●                                      | ●                           | ●                       | ●                     |
| Lewis 2011                             | ●                       | ●                   | ●                             | ●                                      | ●                           | ●                       | ●                     |
| Lloyd 2013                             | ●                       | ●                   | ●                             | ●                                      | ●                           | ●                       | ●                     |
| Menne 2014                             | ●                       | ●                   | ●                             | ●                                      | ●                           | ●                       | ●                     |
| Milojevic 2016                         | ●                       | ●                   | ●                             | ●                                      | ●                           | ●                       | ●                     |
| Naunheim 2006                          | ●                       | ●                   | ●                             | ●                                      | ●                           | ●                       | ●                     |
| Oghara 2011                            | ●                       | ●                   | ●                             | ●                                      | ●                           | ●                       | ●                     |
| Powell 2007                            | ●                       | ●                   | ●                             | ●                                      | ●                           | ●                       | ●                     |
| Radford 2014                           | ●                       | ●                   | ●                             | ●                                      | ●                           | ●                       | ●                     |
| Sedtis 2015                            | ●                       | ●                   | ●                             | ●                                      | ●                           | ●                       | ●                     |
| Terkanen 2006                          | ●                       | ●                   | ●                             | ●                                      | ●                           | ●                       | ●                     |
| Wang 2015                              | ●                       | ?                   | ●                             | ●                                      | ●                           | ●                       | ●                     |
| Wanner 2005                            | ●                       | ●                   | ●                             | ?                                      | ●                           | ●                       | ●                     |
| Weston 2011                            | ●                       | ●                   | ●                             | ●                                      | ●                           | ●                       | ●                     |
| Whiteley 2014                          | ●                       | ●                   | ●                             | ●                                      | ●                           | ●                       | ●                     |
| Zoungas 2014                           | ●                       | ●                   | ●                             | ●                                      | ●                           | ●                       | ●                     |
